# Supplementary material for: High hydrostatic pressure induces vigorous flagellar beating in Chlamydomonas non-motile mutants lacking the central apparatus
Source: PubMed Central journal article supplement (PMC7005269; doi:10.1038/s41598-020-58832-8), 2020-02-06
Supplement: 41598_2020_58832_MOESM1_ESM.pdf [file 41598_2020_58832_MOESM1_ESM.pdf]

**High hydrostatic pressure induces vigorous flagellar beating in  
*Chlamydomonas* non-motile mutants lacking the central apparatus**

Toshiki Yagi<sup>1,\*</sup> and Masayoshi Nishiyama<sup>2,3,\*</sup>

1. Department of Life Sciences, Faculty of Life and Environmental Sciences, Prefectural University of Hiroshima, Shobara, Hiroshima, 727-0023, Japan
2. The Hakubi Center for Advanced Research, Kyoto University, Yoshida, Kyoto, 606-8501, Japan
3. Department of Physics, Faculty of Science and Engineering, Kindai University, 3-4-1 Kowakae, Higashiosaka City, Osaka 577-8502, Japan

**Supplemental information**

**Table S1. *Chlamydomonas* strains used in this study**

|                    | Axoneme structures |       |                       | Beating |        |
|--------------------|--------------------|-------|-----------------------|---------|--------|
|                    | OAD*               | IAD** | CP# / RS <sup>+</sup> | 0.1 MPa | 80 MPa |
| WT                 | ○                  | ○     | ○                     | ○       | ○      |
| <i>odal</i>        | ×                  | ○     | ○                     | ○       | ○      |
| <i>ida5</i>        | ○                  | †×    | ○                     | ○       | ○      |
| <i>pf18 / pf14</i> | ○                  | ○     | ×                     | ×       | ○      |
| <i>pf18ida5</i>    | ○                  | †×    | ×                     | ×       | ○      |
| <i>pf18odal</i>    | ×                  | ○     | ×                     | ×       | ×      |

○: at least 10% of the cells displayed flagellar beating; ×: none displayed flagellar beating

\*Outer-arm dynein

\*\*Inner-arm dynein

#Central pair microtubule

<sup>+</sup>Radial spokes

<sup>†</sup>Missing dynein a, c, d, and e, which are four of the seven major-type of dyneins (dynein a-f), and DHC11, which is one of the three minor-type dyneins (DHC3, DHC4, and DHC11)<sup>19</sup>.

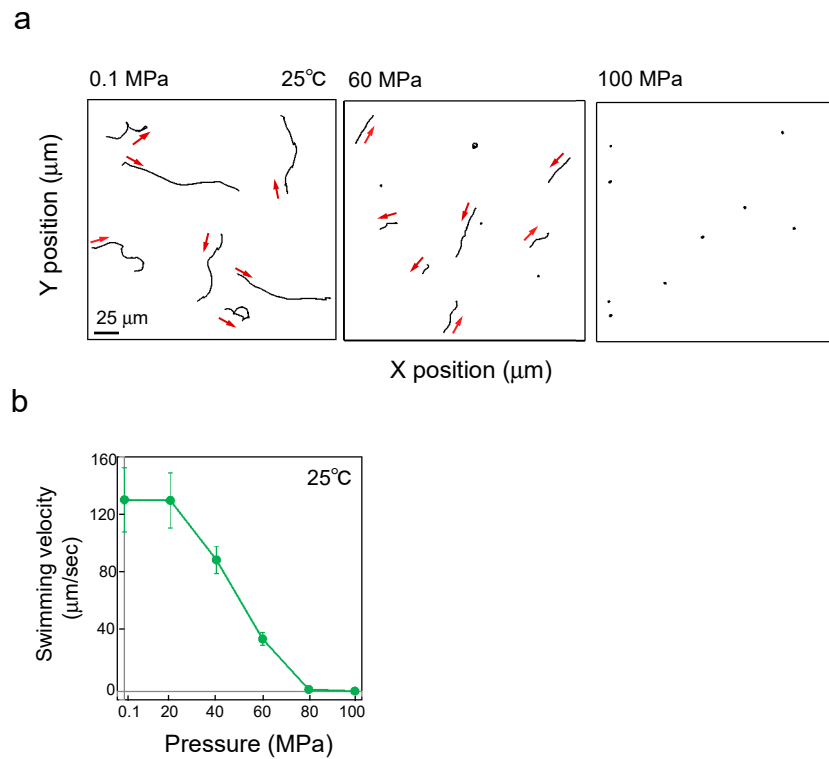

**Figure S1.** Motility of wild-type cells at high pressure.

(a) Swimming trajectories of WT for one second at 0.1, 60, and 100 MPa. Temperature: 25°C. (b) Swimming velocity of WT cells at various pressures. More than 20 cells were examined for each data point. Temperature: 25°C.

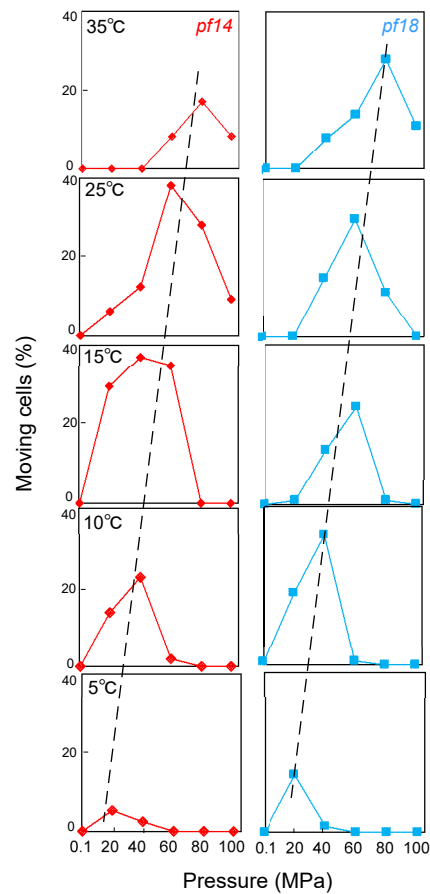

**Figure S2.** Temperature-dependent changes in *pf14* and *pf18* motility. Percentage of moving cells was calculated under various pressure conditions at 5, 10, 15, 25, and 35°C (Red, *pf14*; Blue, *pf18*). More than 40 cells were examined for each data point. Broken lines show an almost linear temperature-dependency of the optimal pressure. The lower the temperature, the lower the pressure for motility induction.

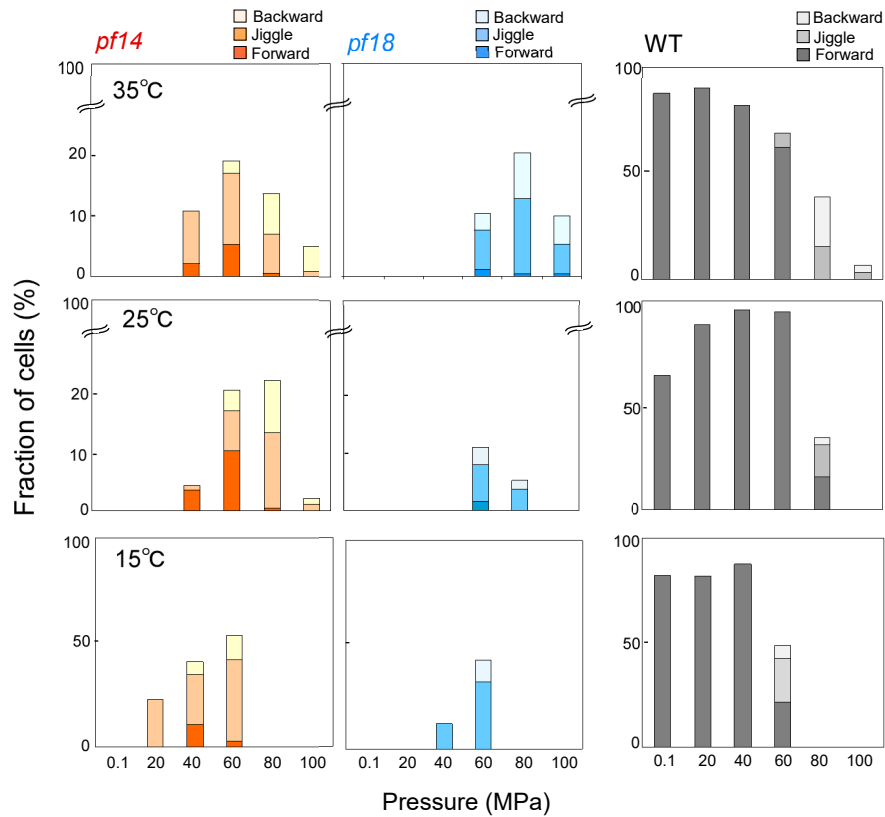

**Figure S3.** Temperature- and pressure-dependent changes of the moving patterns in *pf* mutant and WT.

The fractions of cells in forward-swimming, backward-swimming, or jiggling states were measured at different temperatures and pressures. More than 40 cells were examined for each data point. At lower temperature, cells started backward swimming at lower pressure.

**Movie S1. *pfl4* and *pfl8* cell motility at ambient (0.1 MPa) and high (60 MPa, 80 MPa) pressures.**

Cell movements were recorded with high speed video at 500 frames/sec. The video images are played back at 30 frames/sec. Temperature: 35°C. Bar: 10 µm.

**Movie S2. Bending movements of demembrated and reactivated *pfl4* and *pfl8* axonemes.**

Flagella isolated from cells were demembrated with detergent and the motility of axonemes was reactivated in the presence of 1 mM ATP and 1 mM EGTA at 40 MPa (*pfl4*) and 60 MPa (*pfl8*). The video images were recorded at 500 frames/sec and are played back at 30 frames/sec. Sequential photographs of the beating *pfl4* axoneme were shown in Fig. 3a. Temperature: 25°C. Bar: 10 µm.

**Movie S3. Typical examples of forward-moving, jiggling, and backward-moving cells.**

Movements of *pfl4* at high pressure recorded at 500 frames/sec and played back at 30 frames/sec. The swimming trajectory of a forward-moving cell is shown as “cell a” in Fig. 1c (*pfl4*, at 60MPa), and that of a backward-moving cell as “cell b” in Fig. 1c (*pfl8*, at 80MPa). The jiggling-movement was observed at 60 MPa. Note that the two flagella on a single forward-moving *pfl4* cell often showed different waveforms. In contrast, most of backward-moving cells showed coordinated symmetric flagellar waveform. Temperature: 35 °C.

**Movie S4. Symmetrical flagellar beating in WT cells at 80 MPa.**

WT cell motility was observed at 80 MPa, 35°C. The video images were recorded at 500 frames/sec and are played back at 30 frames/sec.
